# Supplementary material for: Cobalt oxide nanoparticle-decorated reduced graphene oxide (Co3O4–rGO): active and sustainable nanoelectrodes for water oxidation reaction
Source: Royal Society of Chemistry journal article supplement (doi:10.1039/d0nj02598d), 2020-01-01
Supplement: d0nj02598d1.pdf [file d0nj02598d1.pdf]

# **Cobalt Oxide Nanoparticles Decorated Reduced Graphene oxide (Co<sub>3</sub>O<sub>4</sub>-rGO): Active and Sustainable Nanoelectrodes for Water Oxidation Reaction**

**Ajay V. Munde, Balaji B. Mulik, Raviraj P. Dighole and Bhaskar R. Sathe\***

Department Chemistry, Dr. Babasaheb Ambedkar Marathwada University Aurangabad (India).

Corresponding Author: Email: [bhaskarsathe@gmail.com](mailto:bhaskarsathe@gmail.com)

## **Supporting Information**

**Fig.S-1: Energy Dispersive Analysis of X-ray (EDAX) in detail Spectra**

**Fig.S-2: X-ray Photoelectron Spectroscopy (XPS) of Co<sub>3</sub>O<sub>4</sub>-rGO**

**Fig.S-3: Electrochemistry**

**Fig.S-4: pH Dependent Studies:**

**Fig.S-5: Equivalence circuit and value Co<sub>3</sub>O<sub>4</sub>-rGO:**

**Fig.S-6: Morphological Stability analysis using Transmission Electron Microscopy (TEM) after electrocatalytic studies of Co<sub>3</sub>O<sub>4</sub>-rGO and Calculation for Enhancement Factor**

**Fig.S-1: Energy Dispersive Analysis of X-ray (EDAX) in detail Spectra**

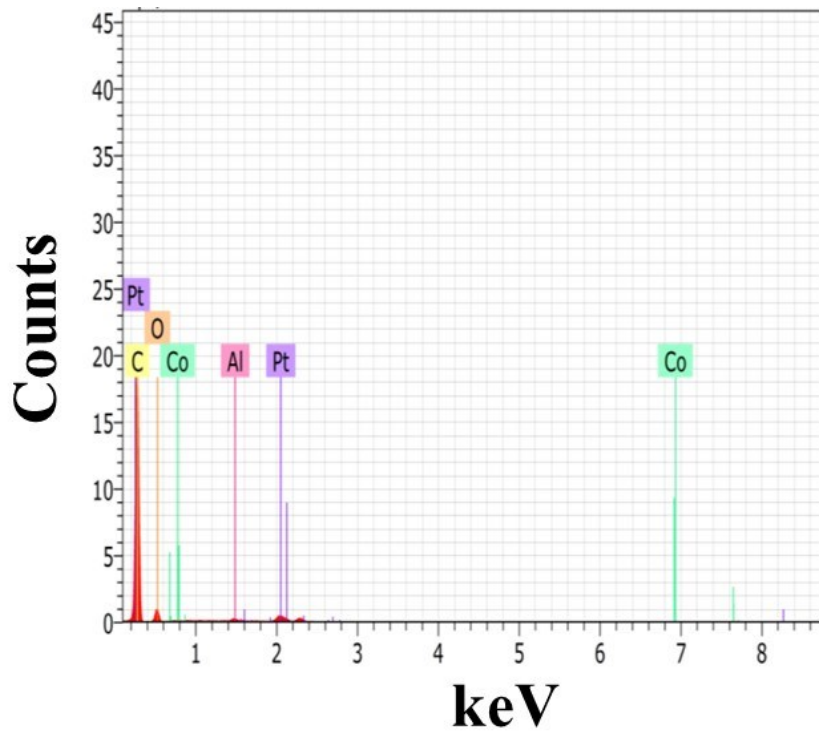

Fig.S-1 : Indicate the energy dispersive analysis of (EDAX) spectra of  $\text{Co}_3\text{O}_4@\text{rGO}$  are clearly indicate Co( 2%), O (14%) and C (84%) element.

**Fig.S-2: X-ray Photoelectron Spectroscopy (XPS) of  $\text{Co}_3\text{O}_4\text{-rGO}$**

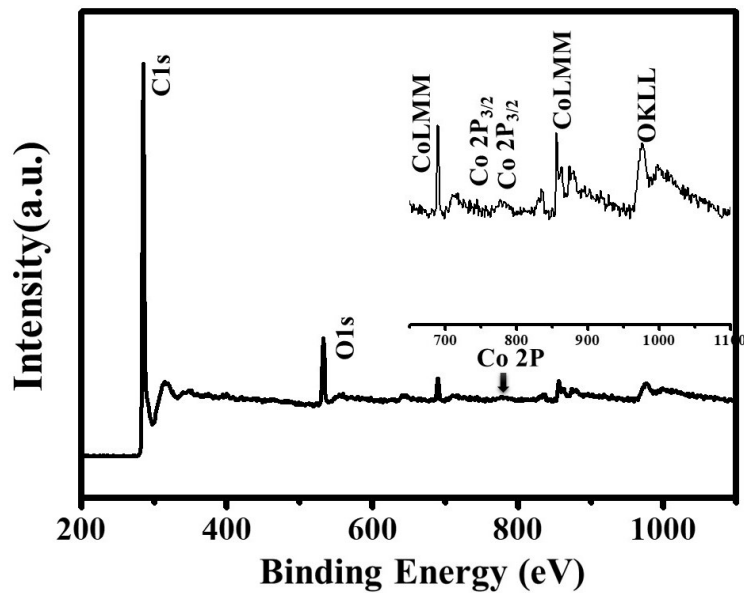

Fig. S-2 XPS full Survey of  $\text{Co}_3\text{O}_4@\text{rGO}$

**Fig.S-3: Electrochemistry:**

**Fig.S-3: i Water oxidation reaction**

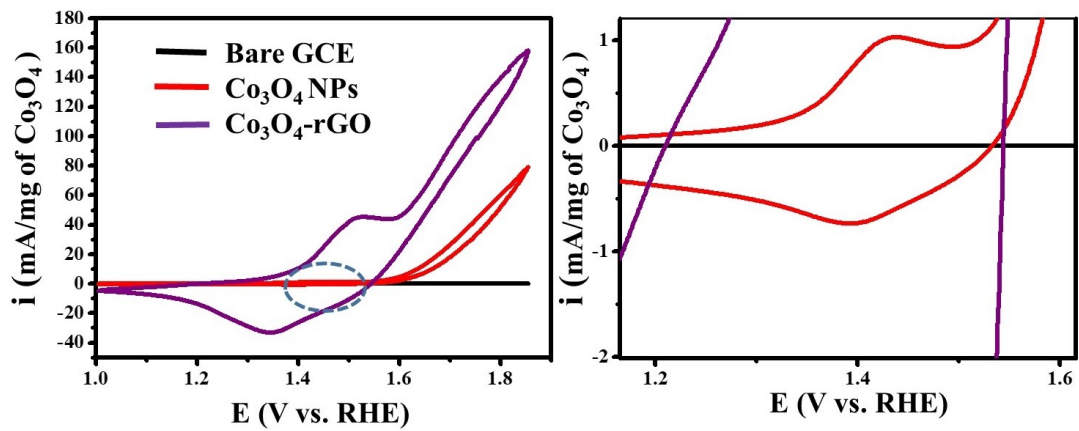

Fig. 3 i : Superimposed (a) cyclic voltammogram of bare GC (black),  $\text{Co}_3\text{O}_4$ -NPs (red) and  $\text{Co}_3\text{O}_4$ -rGO (purple) electrodes in 0.5 M KOH at 50 mV/s.

**Fig.S-3: ii Scan rate Dependent Study:**

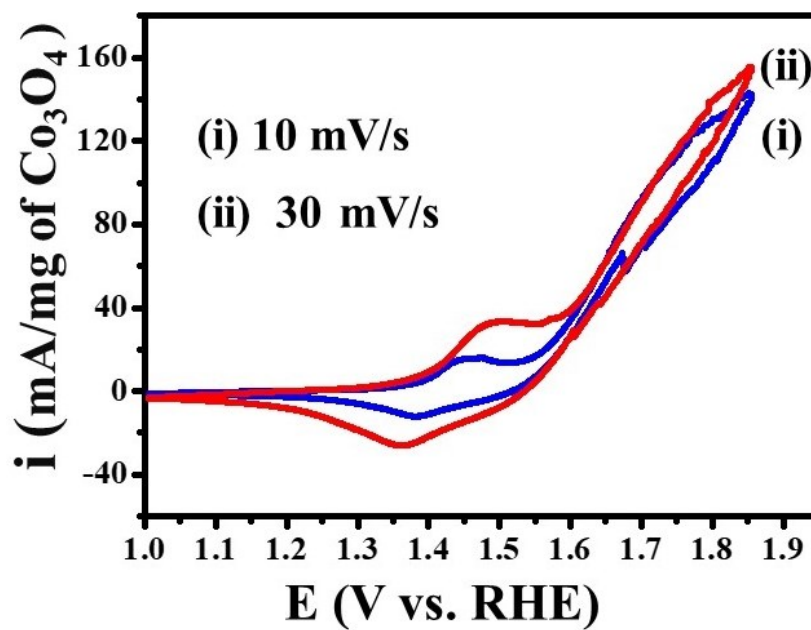

Fig S-3 ii : Superimposed scan rate dependent of cyclic voltammogram of  $\text{Co}_3\text{O}_4$ -rGO in 0.5 M KOH using Pt and SCE counter and reference electrodes respectively at different scan rates from (i) 10 , and (ii) 30 mV/s.

**Fig.S-4: pH Dependent Studies:**

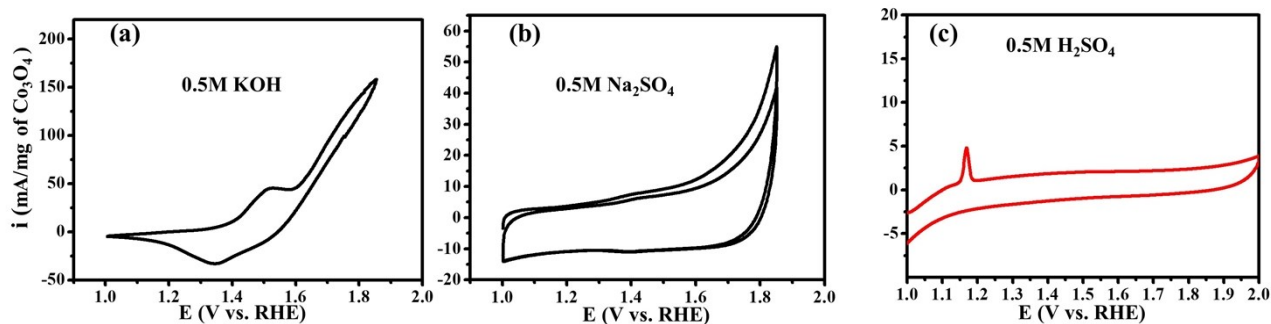

**Fig. S. 4** Morphological Stability analysis using Transmission Electron Microscopy (TEM) after electrocatalytic studies of  $\text{Co}_3\text{O}_4\text{-rGO}$

**Fig.S-5: Equivalence circuit and value  $\text{Co}_3\text{O}_4\text{-rGO}$ :**

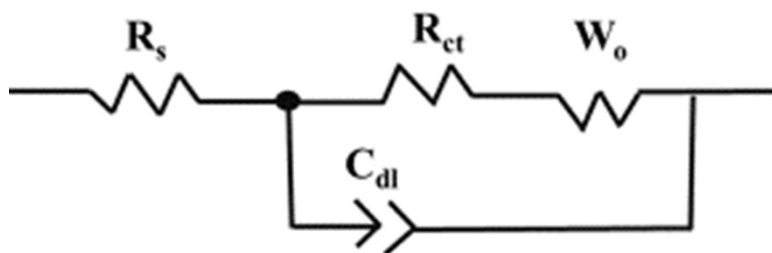

| Parameter                                      | Value |
|------------------------------------------------|-------|
| $R_s$ ( $\Omega \text{ cm}^{-2}$ )             | 26    |
| $R_{ct}$ ( $\Omega \text{ cm}^{-2}$ )          | 240   |
| $C_{dl} \times 10^{-4}$ ( $\text{F cm}^{-2}$ ) | 10    |

**Fig.S-6: Morphological Stability analysis using Transmission Electron Microscopy (TEM) after electrocatalytic studies of  $\text{Co}_3\text{O}_4$ -rGO**

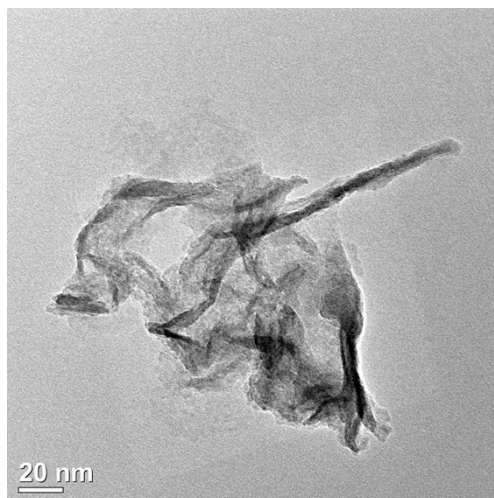

**Fig.S- 6:**-TEM image of  $\text{Co}_3\text{O}_4$ @rGO after chronoamperometric studies.

Fig.S-6 shows TEM image of the  $\text{Co}_3\text{O}_4$ @rGO electrocatalyst after chronoamperometric studies, confirms the morphological stability of the  $\text{Co}_3\text{O}_4$  NPs on rGO and these findings confirms the exceptionally higher stability of proposed systems.

**Calculation for Enhancement Factor<sup>1</sup>:**

Enhancement Factor = Current density of Electrocatalyst /bare Electrode\* 100

**References**

- [1] B.R. Sathe, B.K. Balan, V.K. Pillai, Energy Environ. Sci. 4 (2011) 1029.
